# Supplementary material
Source: Springer Nature journal article supplement (https://www.springermedizin.de/resource/supplementary/12958_2009_552_MOESM9_ESM.pdf/9568288)

A)

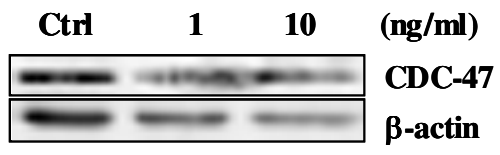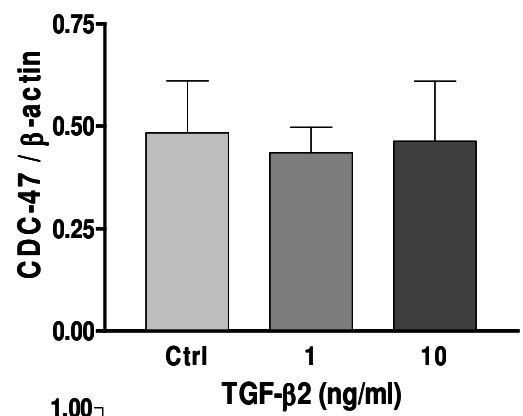

B)

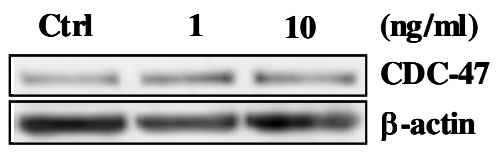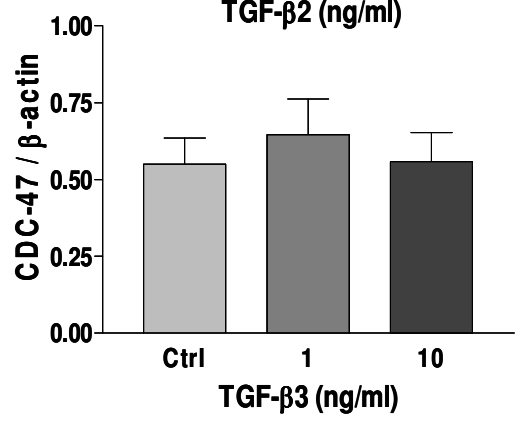

C)

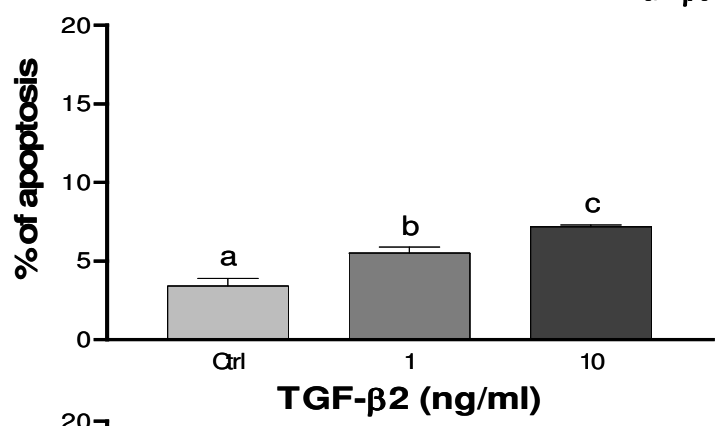

D)

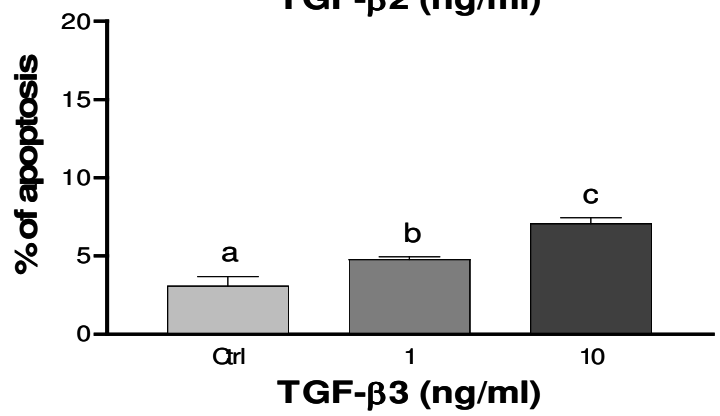

Supplement: MOESM9 [file 9568288]
